# Supplementary material for: Water molecule transfer equilibrium between hydrated Li + and Mg 2+ to reveal the lithium separation mechanism
Source: Royal Society of Chemistry journal article supplement (doi:10.1039/d5nj03729h), 2025-12-24
Supplement: d5nj03729h1.pdf [file d5nj03729h1.pdf]

## **Water Molecule Transfer Equilibrium between Hydrated Li<sup>+</sup> and Mg<sup>2+</sup> to Reveal the Lithium Separation Mechanism**

Xingfang Wang<sup>1,2,3#</sup>, Yuze Zhang<sup>1,2,#</sup>, Dong Shi<sup>1,2,3</sup>, Jinfeng Li<sup>4</sup>, Hu Liu<sup>1,2\*</sup>, Lijuan Li<sup>1,2\*</sup>

<sup>1</sup>Key Laboratory of Comprehensive and Highly Efficient Utilization of Salt Lake Resources, Qinghai Institute of Salt Lakes, Chinese Academy of Sciences, Xining, Qinghai 810008, China.

<sup>2</sup>Qinghai Engineering and Technology Research Center of Comprehensive Utilization of Salt Lake Resources, Xining, Qinghai 810008, China

<sup>3</sup>University of Chinese Academy of Sciences, Beijing 100049, China

<sup>4</sup>Key Laboratory of Organofluorine Chemistry, Center for Excellence in Molecular Synthesis, Shanghai Institute of Organic Chemistry, Chinese Academy of Sciences, Shanghai 200032, China

# These authors contributed equally to this work

\* E-mail address: liuhu@isl.ac.cn; lilj@isl.ac.cn.

## 1. Estimation of the water/Mg<sup>2+</sup> ratio in high magnesium bittern

In high - magnesium systems, the concentration of magnesium chloride often reaches 4 - 5 mol·L<sup>-1</sup>. For instance, in the bittern from solar saltworks, a typical concentration of magnesium chloride is 4.60 mol·L<sup>-1</sup>. Without considering the hydration of lithium and other existing particles, the water/ion ratio of magnesium can be calculated as 10.57. The following is the detailed calculation process: The density of the solution was determined by the gravimetric method to be 1.314 g·mL<sup>-1</sup>. The molar masses of MgCl<sub>2</sub> and water are 95.39 g·mol<sup>-1</sup> and 18.00 g·mol<sup>-1</sup>, respectively. Assuming a volume of 1 L for the high - magnesium bittern, its mass is 1314 g. The mass of MgCl<sub>2</sub> is calculated as 4.60 mol × 95.39 g·mol<sup>-1</sup> = 438.79 g, and the mass of water is 1314 g - 438.79 g = 875.21 g. Consequently, the water - to - magnesium ratio is calculated as (875.21 g ÷ 18.00 g·mol<sup>-1</sup>) ÷ (438.79 g ÷ 95.39 g·mol<sup>-1</sup>) = 10.57.

Moreover, in a typical study, the second hydration sphere of the magnesium ion needs to be considered. A maximum hydration number of 18 for magnesium is taken into account. When considering the second hydration spheres of lithium and water, a maximum hydration number of 12 for lithium and 22 for water are incorporated into this study.

## 2. Initial guess and optimized structures

The typical initial guessed structures are illustrated in Figure\_S1, while the optimized structures are presented separately in Figure\_S2. The numbers assigned to the oxygen atoms correspond to the sequential addition of water molecules. The optimized structures reveal that as the number of hydration water molecules increases, water - ring trimers and tetramers become increasingly prevalent in the hydration shells of lithium and magnesium ions. Additionally, pentamer and hexamer rings are observed within larger water clusters. Overall, these structures are reasonable and consistent with the principles reported in the literature.

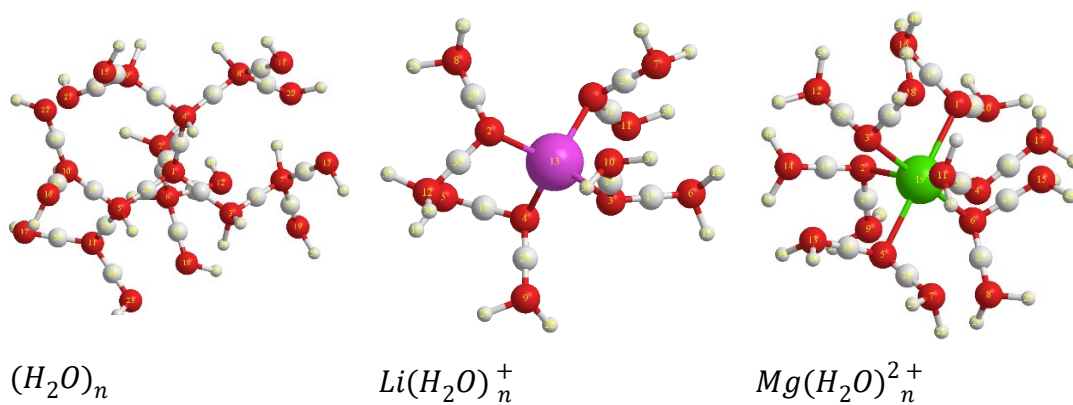

**Figure S1.** Initial guess of  $(H_2O)_n$ ,  $Li(H_2O)_n^+$  and  $Mg(H_2O)_n^{2+}$

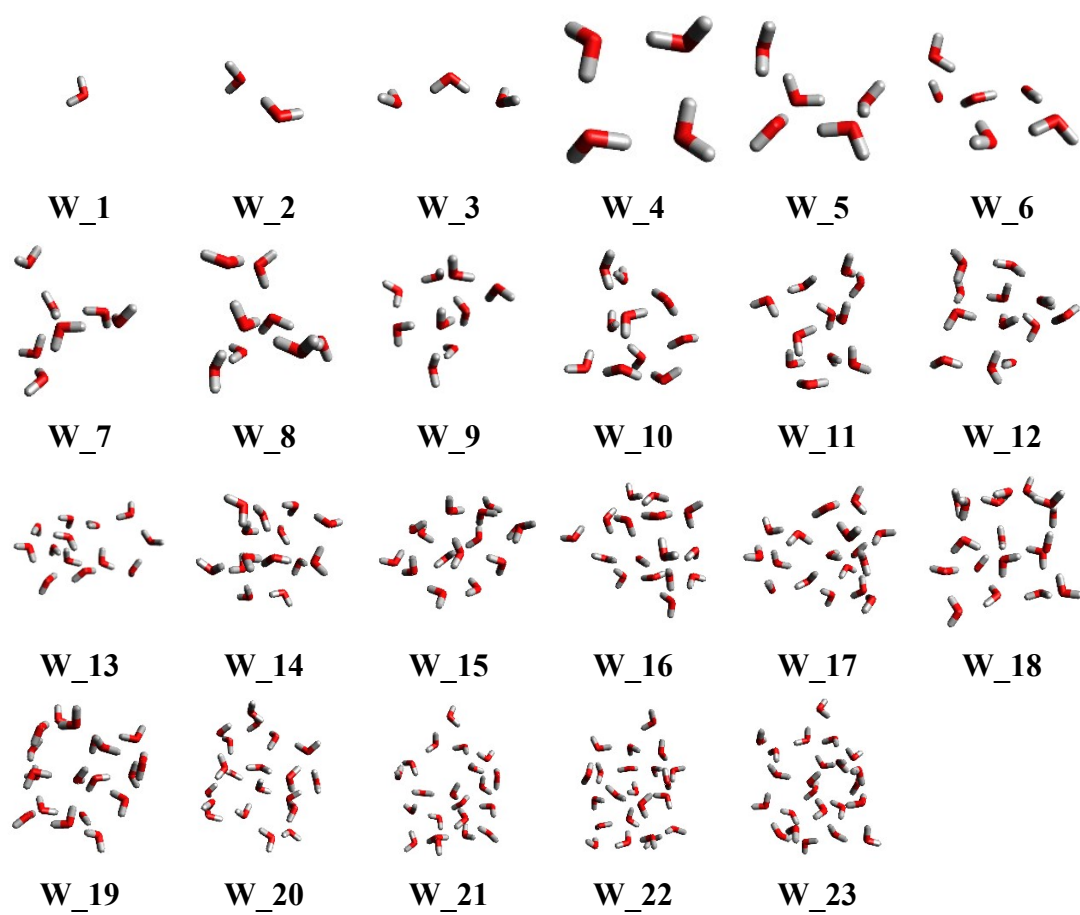

**Figure S2.** Optimized structures of  $(H_2O)_n$

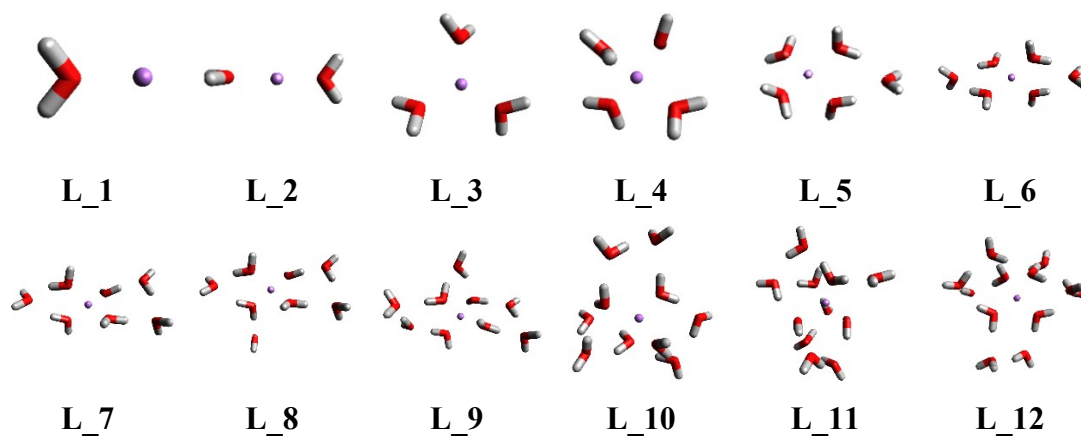

**Figure S3.** Optimized structures of  $\text{Li}(\text{H}_2\text{O})_n^+$  clusters

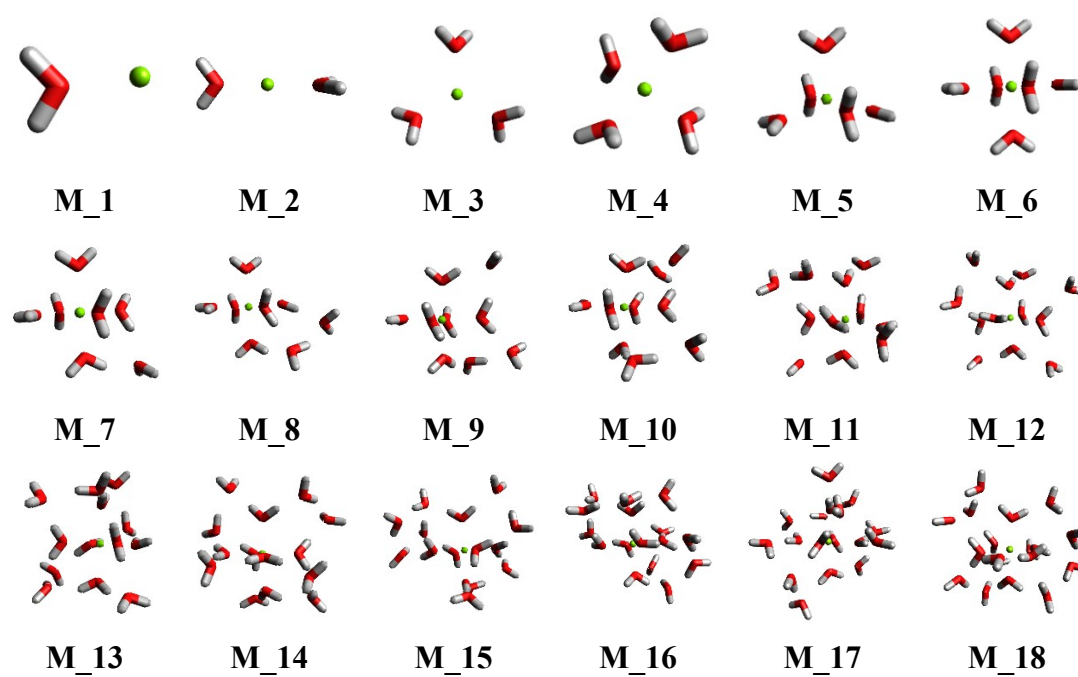

**Figure S4.** Optimized structures of  $Mg(H_2O)_n^{2+}$  clusters
